# Supplementary material for: Neutralization of SARS-CoV-2 spike 69/70 deletion, E484K, and N501Y variants by BNT162b2 vaccine-elicited sera
Source: PubMed Central journal article supplement — bioRxiv. 2021 Jan 27:2021.01.27.427998. Preprint. [Version 1] doi: 10.1101/2021.01.27.427998 (PMC7852264; doi:10.1101/2021.01.27.427998), 2021-01-27
Supplement: NIHPP2021.01.27.427998-supplement-1.pdf [file NIHPP2021.01.27.427998-supplement-1.pdf]

212 **Supplementary information**

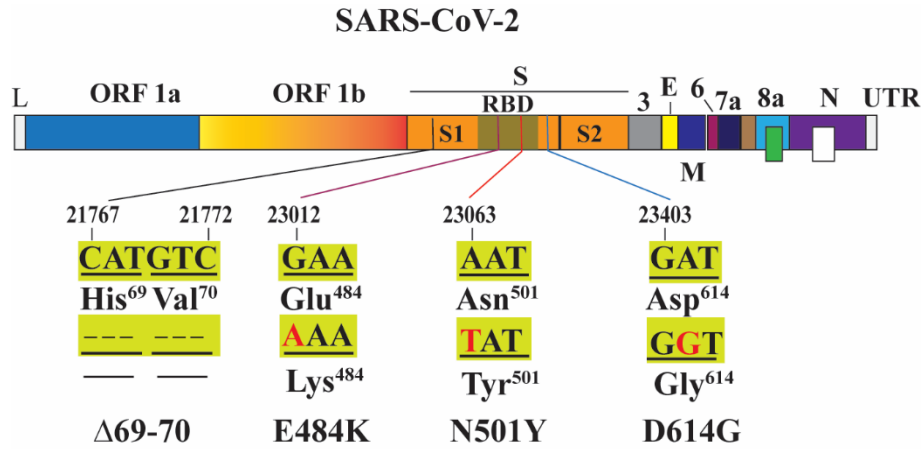

213

214 **Supplementary Figure 1. Engineered mutations.** Nucleotide and amino acid positions are  
 215 indicated. Deletions are depicted by dotted lines. Mutant nucleotides are in red. L, leader  
 216 sequence; ORF, open reading frame; RBD, receptor binding domain; S, spike glycoprotein; S1,  
 217 N-terminal furin cleavage fragment of S; S2, C-terminal furin cleavage fragment of S; E,  
 218 envelope protein; M, membrane protein; N, nucleoprotein; UTR, untranslated region.

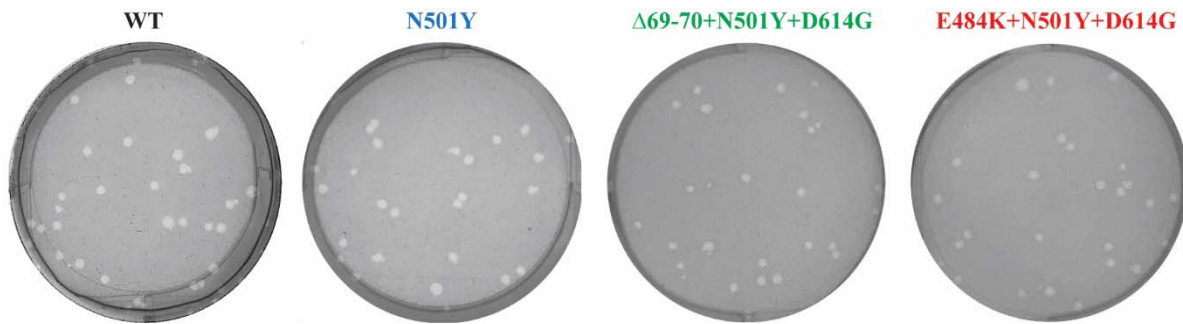

219

220 **Supplementary Figure 2. Plaque morphologies of WT (USA-WA1/2020), mutant N501Y,**  
221 **Δ69/70+N501Y+D614G, and E484K+N501Y+D614G SARS-CoV-2s on Vero E6 cells.**



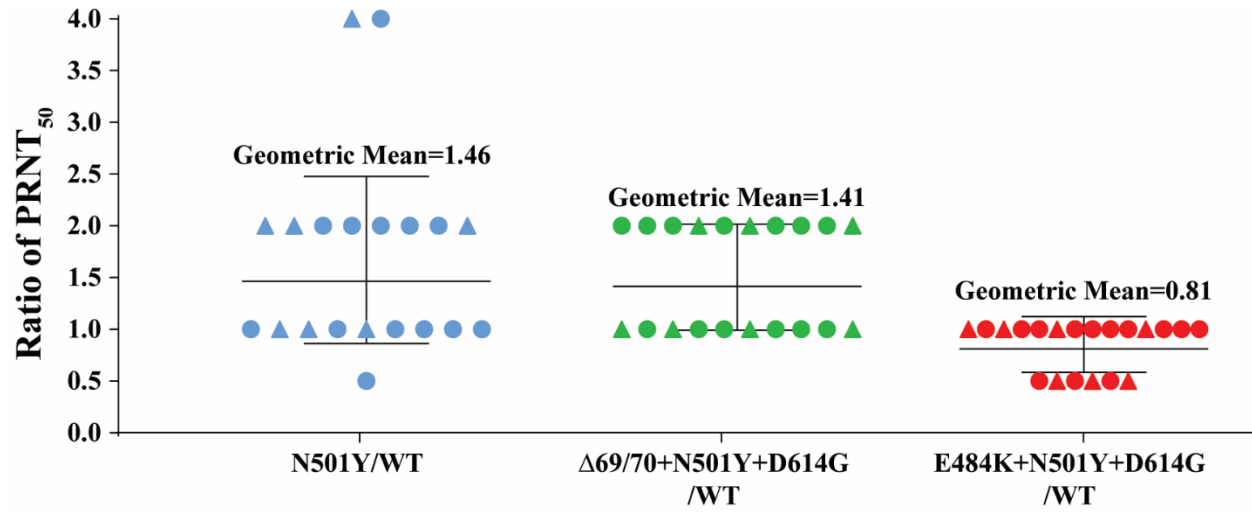

224

225 **Supplementary Figure 4. Ratios of neutralization GMTs against mutant viruses to GMTs**  
226 **against WT virus.** Triangles represent sera drawn two weeks after the second dose of  
227 vaccination; circles represent sera drawn four weeks after the second dose of vaccination.

228 **Supplementary Table 1. PRNT<sub>50</sub>s of twenty BNT162b2 post-immunization sera against**  
229 **wild-type (USA-WA1/2020) and mutant N501Y SARS-CoV-2s**

| Serum ID | PRNT <sub>50</sub> |       | PRNT <sub>50</sub> ratio<br>(N501Y/WT) |
|----------|--------------------|-------|----------------------------------------|
|          | WT                 | N501Y |                                        |
| 1        | 160                | 640   | 4                                      |
| 2        | 160                | 320   | 2                                      |
| 3        | 320                | 640   | 2                                      |
| 4        | 80                 | 160   | 2                                      |
| 5        | 160                | 160   | 1                                      |
| 6        | 320                | 320   | 1                                      |
| 7        | 640                | 640   | 1                                      |
| 8        | 160                | 160   | 1                                      |
| 9        | 640                | 640   | 1                                      |
| 10       | 640                | 1280  | 2                                      |
| 11       | 160                | 640   | 4                                      |
| 12       | 320                | 320   | 1                                      |
| 13       | 640                | 1280  | 2                                      |
| 14       | 640                | 320   | 0.5                                    |
| 15       | 320                | 640   | 2                                      |
| 16       | 320                | 640   | 2                                      |
| 17       | 640                | 640   | 1                                      |
| 18       | 640                | 1280  | 2                                      |
| 19       | 640                | 640   | 1                                      |
| 20       | 640                | 640   | 1                                      |

230

231

232 **Supplementary Table 2. PRNT<sub>50</sub>s of twenty BNT162b2 post-immunization sera against**  
 233 **wild-type (USA-WA1/2020), Δ69/70+N501Y+D614G, and E484K+N501Y+D614G SARS-CoV-**  
 234 **2s**

| Serum ID | PRNT <sub>50</sub> |                    |                   | PRNT <sub>50</sub> ratio |                      |
|----------|--------------------|--------------------|-------------------|--------------------------|----------------------|
|          | WT                 | Δ69/70+N501Y+D614G | E484K+N501Y+D614G | Δ69/70+N501Y+D614G/WT    | E484K+N501Y+D614G/WT |
| 1        | 320                | 640                | 320               | 2                        | 1                    |
| 2        | 160                | 160                | 80                | 1                        | 0.5                  |
| 3        | 640                | 1280               | 640               | 2                        | 1                    |
| 4        | 160                | 160                | 80                | 1                        | 0.5                  |
| 5        | 320                | 320                | 320               | 1                        | 1                    |
| 6        | 640                | 640                | 640               | 1                        | 1                    |
| 7        | 640                | 1280               | 320               | 2                        | 0.5                  |
| 8        | 320                | 320                | 160               | 1                        | 0.5                  |
| 9        | 1280               | 1280               | 1280              | 1                        | 1                    |
| 10       | 640                | 1280               | 640               | 2                        | 1                    |
| 11       | 320                | 320                | 320               | 1                        | 1                    |
| 12       | 640                | 1280               | 320               | 2                        | 0.5                  |
| 13       | 1280               | 2560               | 1280              | 2                        | 1                    |
| 14       | 320                | 320                | 320               | 1                        | 1                    |
| 15       | 320                | 640                | 320               | 2                        | 1                    |
| 16       | 640                | 640                | 640               | 1                        | 1                    |
| 17       | 640                | 1280               | 640               | 2                        | 1                    |
| 18       | 320                | 640                | 320               | 2                        | 1                    |
| 19       | 640                | 640                | 320               | 1                        | 0.5                  |
| 20       | 640                | 1280               | 640               | 2                        | 1                    |

235
